# Supplementary material for: Mimicking the 2-oxoglutaric acid signalling function using molecular probes: insights from structural and functional investigations
Source: Royal Society of Chemistry journal article supplement (doi:10.1039/c4ob00630e), 2014-01-01

## Supporting information

### Mimicking 2-oxoglutarate signaling function using molecular probes: insights from structural and functional investigations

Yang Wang,<sup>a,b</sup> Xinjun Liu,<sup>a,b</sup> Erik Laurini,<sup>c</sup> Paola Posocco,<sup>c,d</sup> Fabio Ziarelli,<sup>e</sup> Maurizio Fermeglia,<sup>c,d</sup> Fanqi Qu,<sup>b</sup> Sabrina Pricl,<sup>c,d</sup> Cheng-Cai Zhang<sup>f</sup> and Ling Peng\*<sup>a</sup>

<sup>a</sup> Aix-Marseille Université CNRS, CINaM UMR 7325, Marseille, France

<sup>b</sup> College of chemistry and Molecular sciences, Wuhan University, China;

<sup>c</sup> Molecular Simulation Engineering(MOSE) Laboratory, Department of Engineering and Architecture(DEA), University of Trieste, Italy;

<sup>d</sup> National Interuniversity Consortium for Material Science and Technology, Research Unit MOSE-DEA, University of Trieste, Italy;

<sup>e</sup> Aix-Marseille Université Spectropole, CNRS FR 1739, Marseille, France

<sup>f</sup> Laboratoire de Chimie Bactérienne, CNRS UMR 7283, Marseille, France

E-mail: ling.peng@univ-amu.fr

### Table of contents

|                                                                                            |           |
|--------------------------------------------------------------------------------------------|-----------|
| <b><sup>1</sup>H and <sup>13</sup>C NMR spectra of the synthesized 2-OG analogues.....</b> | <b>S2</b> |
|--------------------------------------------------------------------------------------------|-----------|

# <sup>1</sup>H and <sup>13</sup>C NMR spectra of the synthesized 2-OG analogues

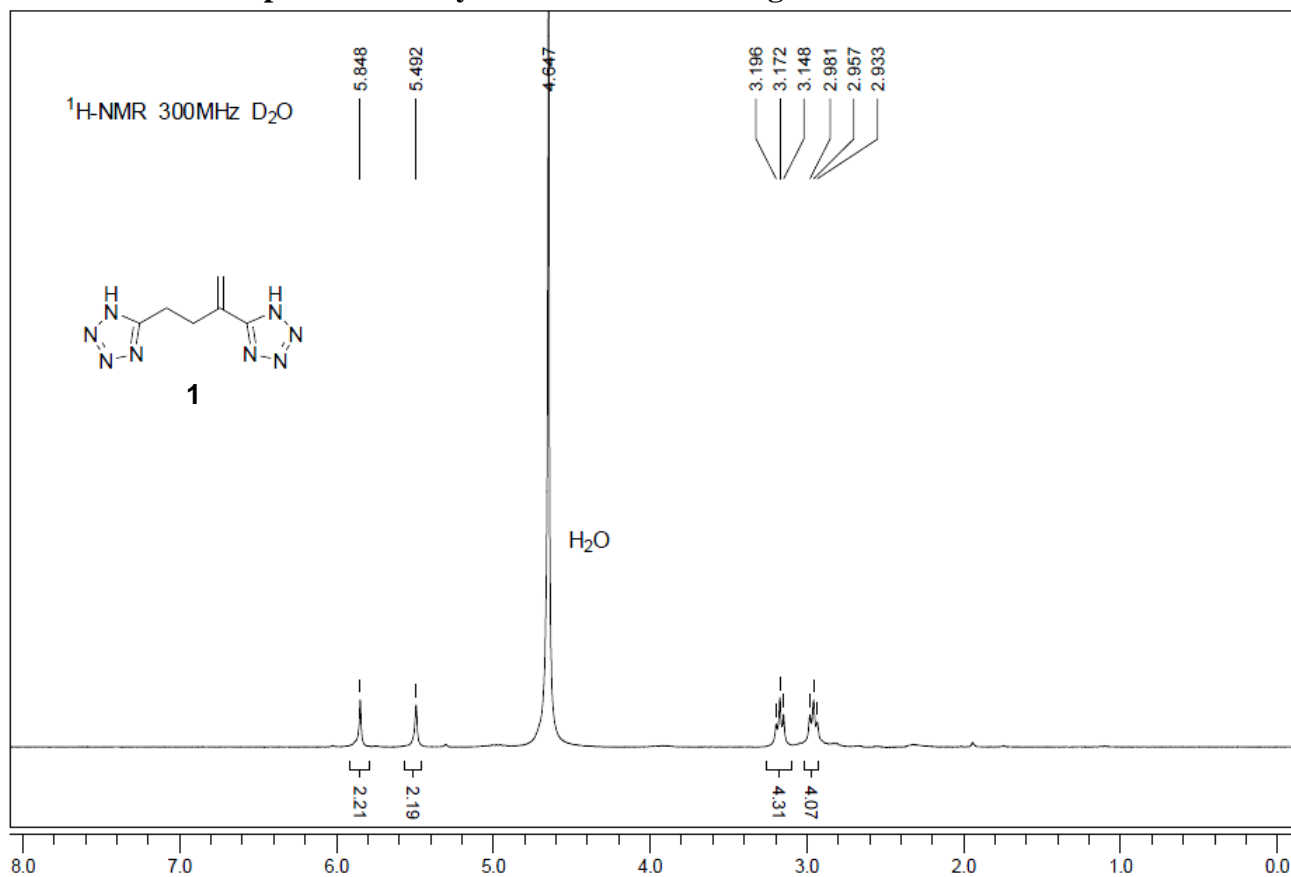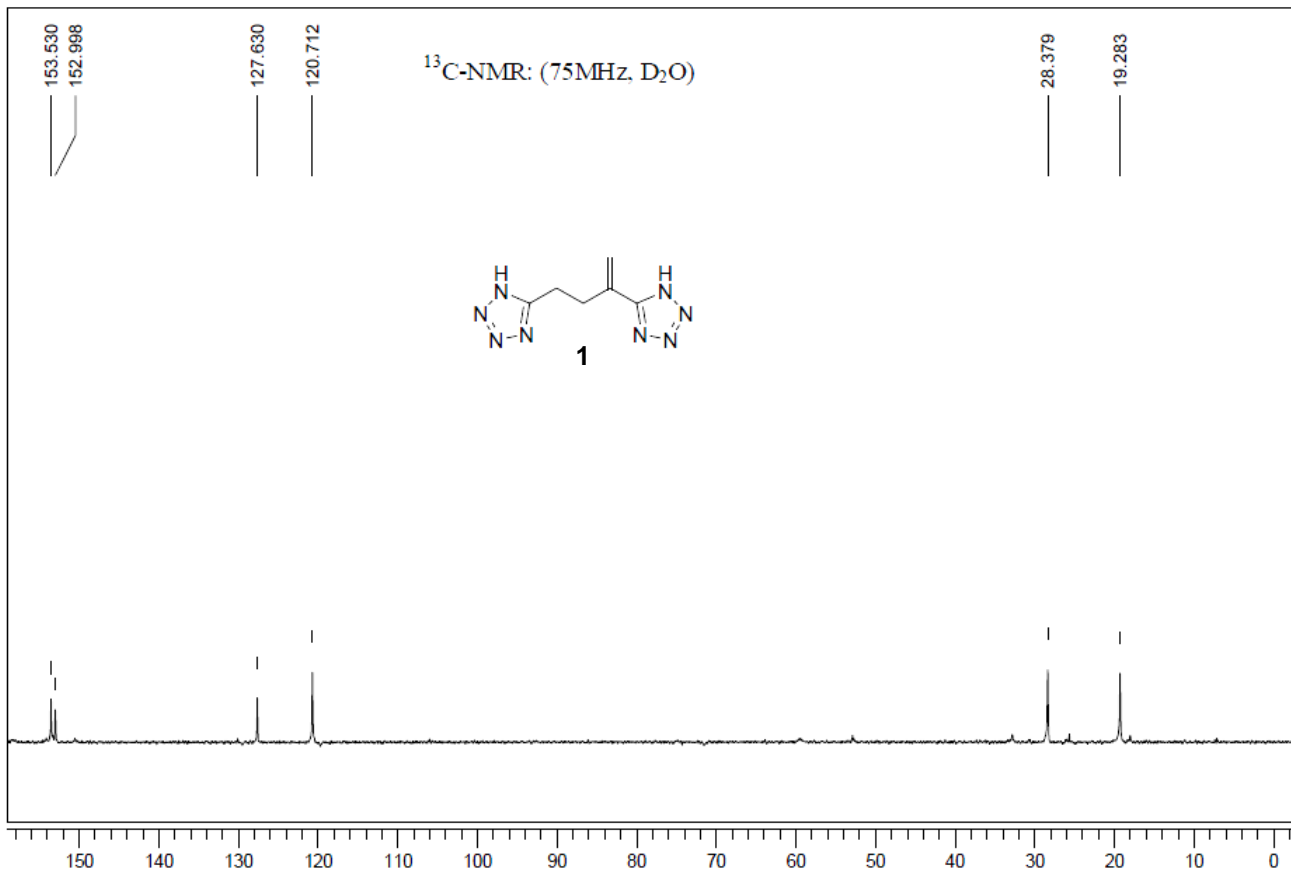

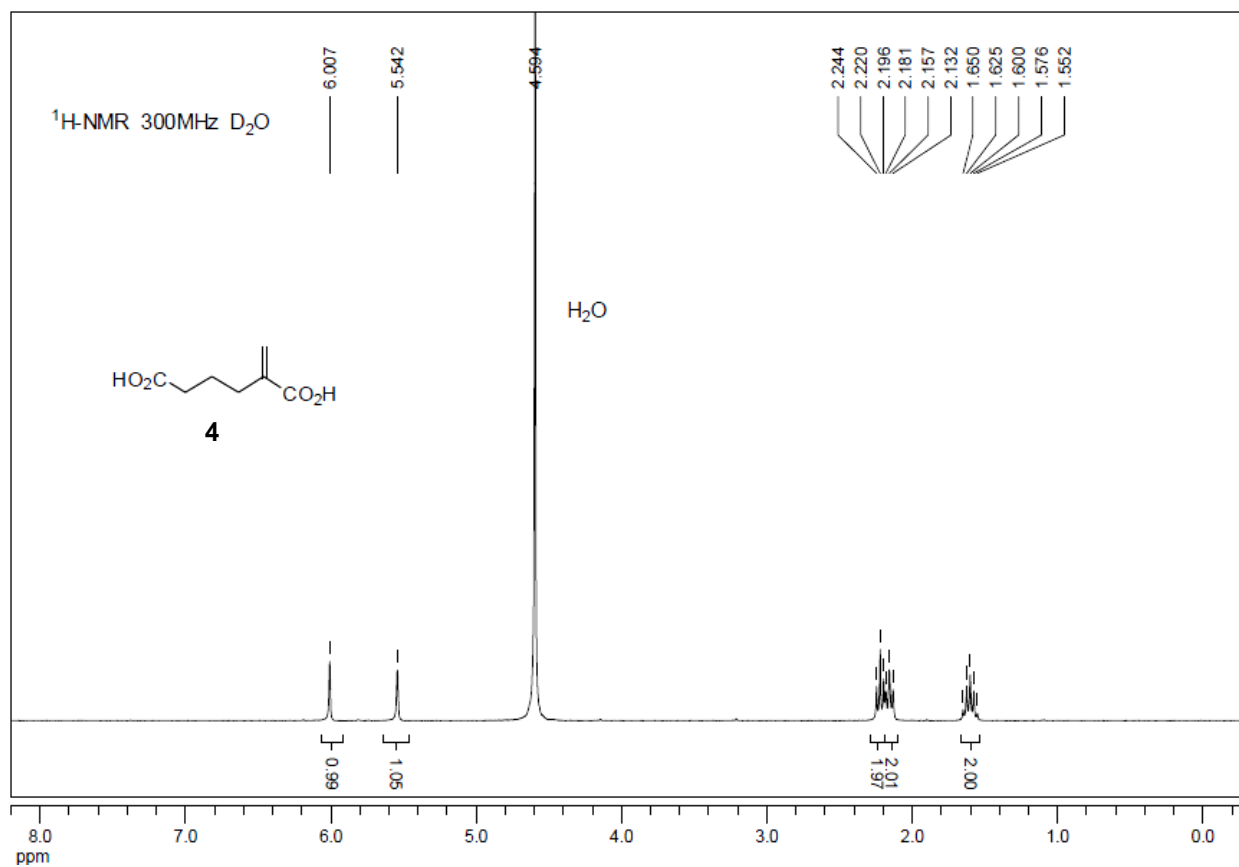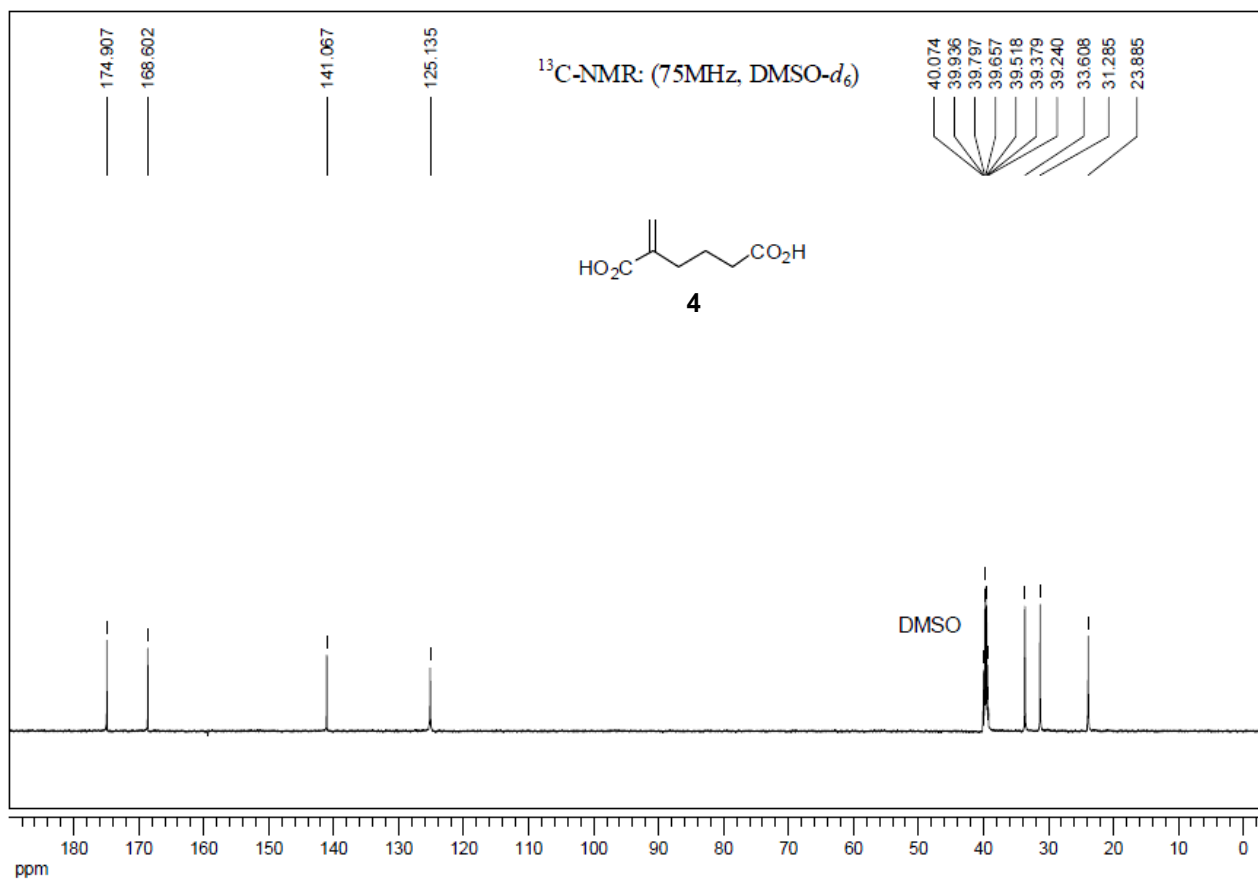

Supplement: c4ob00630e1.pdf [file c4ob00630e1.pdf]
